# Supplementary material for: Research Trends and Visualization Analysis of Autoimmune Disease-Related Liver Cancer from 2004 to 2024: A Bibliometric Study
Source: Research Square preprint supplement (doi:10.21203/rs.3.rs-6647489/v1), 2025-05-30
Supplement: Supplementary file 1 [file 6bc07b21b5d403647ac88f33.xlsx]

## Sheet: Sheet1
	The top 10 most frequently locally cited documents
Document	DOI	Year	Local Citations	Global Citations	LC/GC Ratio (%)	Normalized Local Citations	Normalized Global Citations
GRORIBÆK L, 2014, J HEPATOL	10.1016/j.jhep.2013.10.020	2014	38	248	15.32	18.12	3.33
MONTANO-LOZA AJ, 2008, AM J GASTROENTEROL	10.1111/j.1572-0241.2008.01922.x	2008	35	72	48.61	25	2.04
WERNER M, 2009, J HEPATOL	10.1016/j.jhep.2008.08.022	2009	29	66	43.94	19.69	0.71
AL-CHALABI T, 2006, J HEPATOL	10.1016/j.jhep.2006.04.007	2006	28	145	19.31	12.08	2.68
WONG RJ, 2011, DIGEST DIS SCI	10.1007/s10620-010-1444-6	2011	26	51	50.98	16.77	0.94
NGU JH, 2012, HEPATOLOGY	10.1002/hep.24743	2012	25	79	31.65	13.66	1.67
YOSHIZAWA K, 2012, HEPATOLOGY	10.1002/hep.25658	2012	23	85	27.06	12.56	1.8
BOONSTRA K, 2013, HEPATOLOGY	10.1002/hep.26565	2013	23	460	5	11.42	4.24
MIGITA K, 2012, LIVER INT	10.1111/j.1478-3231.2011.02734.x	2012	22	43	51.16	12.02	0.91
HIRSCHFIELD GM, 2013, LANCET	10.1016/S0140-6736(13)60096-3	2013	22	420	5.24	10.92	3.87
