# Supplementary material for: Research Trends and Visualization Analysis of Autoimmune Disease-Related Liver Cancer from 2004 to 2024: A Bibliometric Study
Source: Research Square preprint supplement (doi:10.21203/rs.3.rs-6647489/v1), 2025-05-30
Supplement: Supplementary file 2 [file bc8564270645a13fc7edcbb7.xlsx]

## Sheet: Sheet1
	Analysis of Literature from Various Countries
Country	Articles	Articles %	SCP	MCP	MCP %
USA	359	21.5	282	77	21.4
CHINA	352	21.1	303	49	13.9
JAPAN	137	8.2	123	14	10.2
ITALY	96	5.7	76	20	20.8
GERMANY	95	5.7	58	37	38.9
UNITED KINGDOM	57	3.4	39	18	31.6
INDIA	45	2.7	35	10	22.2
CANADA	42	2.5	21	21	50
SPAIN	39	2.3	28	11	28.2
KOREA	28	1.7	26	2	7.1
